# Supplementary material for: Deep divergence of Red-crowned Ant Tanager (Habia rubica: Cardinalidae), a multilocus phylogenetic analysis with emphasis in Mesoamerica
Source: PubMed Central journal article supplement (PMC6139011; doi:10.7717/peerj.5496), 2018-09-12
Supplement: peerj-06-5496-s001.pdf [file peerj-06-5496-s001.pdf]

| #  | Taxon (subspecies)              | Collection number      | Country     | State/Province | Latitude | Longitude |
|----|---------------------------------|------------------------|-------------|----------------|----------|-----------|
| 1  | <i>Habia rubica rosea</i>       | MZFC URRRA 55          | México      | Jalisco        | 20.4658  | -105.2939 |
| 2  | <i>Habia rubica rosea</i>       | MZFC URRRA 60          | México      | Jalisco        | 20.4658  | -105.2939 |
| 3  | <i>Habia rubica rosea</i>       | MZFC URRRA 63          | México      | Jalisco        | 20.4658  | -105.2939 |
| 4  | <i>Habia rubica rosea</i>       | MZFC URRRA 67          | México      | Jalisco        | 20.4658  | -105.2939 |
| 5  | <i>Habia rubica rosea</i>       | MZFC CONACyT 799       | México      | Colima         | 19.4569  | -103.7062 |
| 6  | <i>Habia rubica rosea</i>       | UWBM Michbts08126      | México      | Michoacán      | 18.0951  | -102.3960 |
| 7  | <i>Habia rubica rosea</i>       | UWBM Michbts08196      | México      | Michoacán      | 18.1685  | -102.3113 |
| 8  | <i>Habia rubica rosea</i>       | MZFC MOLGRO40          | México      | Guerrero       | 17.3579  | -99.4625  |
| 9  | <i>Habia rubica rosea</i>       | MZFC MOLGRO41          | México      | Guerrero       | 17.3579  | -99.4625  |
| 10 | <i>Habia rubica rosea</i>       | MZFC MOLGRO42          | México      | Guerrero       | 17.3579  | -99.4625  |
| 11 | <i>Habia rubica rosea</i>       | MZFC MOLGRO43          | México      | Guerrero       | 17.3579  | -99.4625  |
| 12 | <i>Habia rubica rosea</i>       | MZFC MOLGRO261         | México      | Guerrero       | 17.0038  | -99.6437  |
| 13 | <i>Habia rubica rosea</i>       | MZFC MOLGRO262         | México      | Guerrero       | 17.0038  | -99.6437  |
| 14 | <i>Habia rubica rosea</i>       | MZFC MOLGRO454         | México      | Guerrero       | 17.5303  | -101.4428 |
| 15 | <i>Habia rubica rosea</i>       | MZFC MOLGRO455         | México      | Guerrero       | 17.5303  | -101.4428 |
| 16 | <i>Habia rubica rosea</i>       | MZFC MOLGRO438         | México      | Guerrero       | 17.5303  | -101.4428 |
| 17 | <i>Habia rubica affinis</i>     | MZFC OMVP160           | México      | Oaxaca         | 16.9633  | -97.9067  |
| 18 | <i>Habia rubica affinis</i>     | MZFC OMVP161           | México      | Oaxaca         | 16.9633  | -97.9067  |
| 19 | <i>Habia rubica affinis</i>     | MZFC OMVP672           | México      | Oaxaca         | 16.8283  | -97.8800  |
| 20 | <i>Habia rubica affinis</i>     | MZFC OMVP682           | México      | Oaxaca         | 16.8200  | -97.8883  |
| 21 | <i>Habia rubica affinis</i>     | MZFC OMVP1008          | México      | Oaxaca         | 16.2367  | -97.2867  |
| 22 | <i>Habia rubica affinis</i>     | MZFC MIA81             | México      | Oaxaca         | 15.9250  | -96.4200  |
| 23 | <i>Habia rubica affinis</i>     | UWBM Oaxjk07115        | México      | Oaxaca         | 16.1952  | -97.1513  |
| 24 | <i>Habia rubica affinis</i>     | UWBM Oaxjk07058        | México      | Oaxaca         | 16.1952  | -97.1513  |
| 25 | <i>Habia rubica nelsoni</i>     | MZFC Y408176           | México      | Campeche       | 18.0201  | -90.3200  |
| 26 | <i>Habia rubica nelsoni</i>     | MZFC B2000             | México      | Campeche       | 18.5928  | -90.2561  |
| 27 | <i>Habia rubica nelsoni</i>     | MZFC B2037             | México      | Campeche       | 18.5928  | -90.2561  |
| 28 | <i>Habia rubica nelsoni</i>     | MZFC MOL1121           | México      | Campeche       | 18.5992  | -89.2781  |
| 29 | <i>Habia rubica nelsoni</i>     | MZFC MOL1122           | México      | Campeche       | 18.5909  | -89.2577  |
| 30 | <i>Habia rubica nelsoni</i>     | MZFC MOL1149           | México      | Quintana Roo   | 18.5992  | -89.2781  |
| 31 | <i>Habia rubica nelsoni</i>     | ECOSUR-CH<br>ADAB95289 | México      | Quintana Roo   | 19.1597  | -87.8889  |
| 32 | <i>Habia rubica holobrunnea</i> | MZFC Hgo-SLP143        | México      | Hidalgo        | 21.0750  | -98.9550  |
| 33 | <i>Habia rubica holobrunnea</i> | MZFC NAR28             | México      | Veracruz       | 18.7994  | -96.9580  |
| 34 | <i>Habia rubica holobrunnea</i> | MZFC TUX37             | México      | Veracruz       | 18.5888  | -95.0980  |
| 35 | <i>Habia rubica holobrunnea</i> | MZFC TXT15             | México      | Veracruz       | 18.5504  | -95.1237  |
| 36 | <i>Habia rubica holobrunnea</i> | MZFC TXT19             | México      | Veracruz       | 18.5504  | -95.1237  |
| 37 | <i>Habia rubica holobrunnea</i> | MZFC TXT58             | México      | Veracruz       | 18.3098  | -94.8807  |
| 38 | <i>Habia rubica holobrunnea</i> | MZFC TXT62             | México      | Veracruz       | 18.3062  | -94.8798  |
| 39 | <i>Habia rubica holobrunnea</i> | MZFC TXT63             | México      | Veracruz       | 18.3062  | -94.8798  |
| 40 | <i>Habia rubica holobrunnea</i> | MZFC TXT64             | México      | Veracruz       | 18.3008  | -94.7216  |
| 41 | <i>Habia rubica holobrunnea</i> | UWBM Ver343363         | México      | Veracruz       | 18.3211  | -94.8319  |
| 42 | <i>Habia rubica holobrunnea</i> | UWBM Ver393884         | México      | Veracruz       | 18.3211  | -94.8319  |
| 43 | <i>Habia rubica rubicoides</i>  | MZFC CHIMA416          | México      | Oaxaca         | 17.0668  | -94.0500  |
| 44 | <i>Habia rubica rubicoides</i>  | MZFC OMVP545           | México      | Oaxaca         | 17.0667  | -94.5833  |
| 45 | <i>Habia rubica rubicoides</i>  | MZFC OMVP546           | México      | Oaxaca         | 17.0667  | -94.5833  |
| 46 | <i>Habia rubica rubicoides</i>  | MZFC OMVP563           | México      | Oaxaca         | 17.0200  | -94.6586  |
| 47 | <i>Habia rubica rubicoides</i>  | MZFC OMVP574           | México      | Oaxaca         | 17.0200  | -94.6586  |
| 48 | <i>Habia rubica rubicoides</i>  | MZFC YACH378           | México      | Chiapas        | 16.0842  | -90.9767  |
| 49 | <i>Habia rubica rubicoides</i>  | MZFC YACH528           | México      | Chiapas        | 16.9058  | -90.9828  |
| 50 | <i>Habia rubica rubicoides</i>  | UWBM DHB4369           | Guatemala   | Quezaltenango  | 14.6500  | -91.6000  |
| 51 | <i>Habia rubica rubicoides</i>  | JK DHB4362             | Guatemala   | Quezaltenango  | 14.6500  | -91.6000  |
| 52 | <i>Habia rubica rubicoides</i>  | JK DHB4377             | Guatemala   | Quezaltenango  | 14.6500  | -91.6000  |
| 53 | <i>Habia rubica rubicoides</i>  | JK DHB4399             | Guatemala   | Quezaltenango  | 14.6500  | -91.6000  |
| 54 | <i>Habia rubica rubicoides</i>  | KU 5934                | El Salvador | Ahuachapan     | 13.8100  | -89.8070  |
| 55 | <i>Habia rubica rubicoides</i>  | KU 5937                | El Salvador | Ahuachapan     | 13.8100  | -89.8070  |
| 56 | <i>Habia rubica rubicoides</i>  | KU 5949                | El Salvador | Ahuachapan     | 13.8100  | -89.8070  |

|     |                                  |                        |                        |               |          |          |
|-----|----------------------------------|------------------------|------------------------|---------------|----------|----------|
| 57  | <i>Habia rubica rubicoides</i>   | KU 5974                | El Salvador            | Sonsonate     | 13.8280  | -89.5670 |
| 58  | <i>Habia rubica rubicoides</i>   | KU 5978                | El Salvador            | Sonsonate     | 13.8280  | -89.5670 |
| 59  | <i>Habia rubica rubicoides</i>   | KU 5982                | El Salvador            | Sonsonate     | 13.8280  | -89.5670 |
| 60  | <i>Habia rubica rubicoides</i>   | KU 5985                | El Salvador            | Sonsonate     | 13.8280  | -89.5670 |
| 61  | <i>Habia rubica rubicoides</i>   | JK 434136              | El Salvador            | Ahuachapan    | 13.9260  | -89.8411 |
| 62  | <i>Habia rubica rubicoides</i>   | JK 434137              | El Salvador            | Sonsonate     | 13.6824  | -89.6628 |
| 63  | <i>Habia rubica rubicoides</i>   | JK GAV2110             | Honduras               | La Ceiba      | 15.4300  | -86.5200 |
| 64  | <i>Habia rubica rubicoides</i>   | JK GMS145              | Honduras               | La Ceiba      | 15.4300  | -86.5200 |
| 65  | <i>Habia rubica rubicoides</i>   | JK EF529897            | Honduras/<br>Nicaragua | ND            | ND       | ND       |
| 66  | <i>Habia rubica rubicoides</i>   | UWBM DAB1485           | Nicaragua              | Managua       | 11.9900  | -86.2600 |
| 67  | <i>Habia rubica rubicoides</i>   | UWBM DAB1486           | Nicaragua              | Managua       | 11.9900  | -86.2600 |
| 68  | <i>Habia rubica rubicoides</i>   | JK DAB1484             | Nicaragua              | Managua       | 11.9900  | -86.2600 |
| 69  | <i>Habia rubica rubicoides</i>   | JK DAB1508,<br>GMS1070 | Nicaragua              | Managua       | 11.9900  | -86.2600 |
| 70  | <i>Habia rubica rubicoides</i>   | JK DAB1349             | Nicaragua              | Matagalpa     | 13.0150  | -85.9240 |
| 71  | <i>Habia rubica vinacea</i>      | JK ZMUC130351          | Costa Rica             | Alajuela      | 10.3070  | -84.8097 |
| 72  | <i>Habia rubica vinacea</i>      | JK GMS1113             | Panamá                 | ND            | 8.6167   | -80.1000 |
| 73  | <i>Habia rubica vinacea</i>      | JK GMS1013             | Panamá                 | Santa Fe      | 8.0500   | -81.1000 |
| 74  | <i>Habia rubica vinacea</i>      | UWBM JTK04160          | Panamá                 | Santa Fe      | 8.0500   | -81.1000 |
| 75  | <i>Habia rubica vinacea</i>      | JK GMS1070             | Panamá                 | ND            | 8.6167   | -80.1000 |
| 76  | <i>Habia rubica vinacea</i>      | JK JTK04138            | Panamá                 | Santa Fe      | 8.0500   | -81.1000 |
| 77  | <i>Habia rubica vinacea</i>      | JK JTK04166            | Panamá                 | Santa Fe      | 8.0500   | -81.1000 |
| 78  | <i>Habia rubica vinacea</i>      | JK ANSP5772            | Panamá                 | ND            | ND       | ND       |
| 79  | <i>Habia rubica vinacea</i>      | JK ANSP5771            | Panamá                 | ND            | ND       | ND       |
| 80  | <i>Habia rubica rhodinolaema</i> | LSUMNH 27368           | Perú                   | ND            | -4.2325  | -74.2179 |
| 81  | <i>Habia rubica rhodinolaema</i> | LSUMNH 27369           | Perú                   | Loreto        | -4.2325  | -74.2179 |
| 82  | <i>Habia rubica rhodinolaema</i> | JK 40060               | Perú                   | Loreto        | -4.2325  | -74.2179 |
| 83  | <i>Habia rubica rhodinolaema</i> | JK 40061               | Perú                   | Loreto        | -4.2325  | -74.2179 |
| 84  | <i>Habia rubica rhodinolaema</i> | JK 457560              | W Brasil               | Amazonas      | -1.6831  | -65.8331 |
| 85  | <i>Habia rubica rhodinolaema</i> | JK 457559              | W Brasil               | Amazonas      | -1.8827  | -66.9296 |
| 86  | <i>Habia rubica rhodinolaema</i> | JK 457558              | W Brasil               | Amazonas      | -2.4874  | -68.2608 |
| 87  | <i>Habia rubica hesterna</i>     | JK ZMUC120394          | W Brasil               | Mato Grosso   | -9.4478  | -55.8570 |
| 88  | <i>Habia rubica</i>              | JK ANSP1495            | Perú                   | ND            | ND       | ND       |
| 89  | <i>Habia rubica peruviana</i>    | JK 11166               | Perú                   | Ucayali       | -9.8251  | -73.0878 |
| 90  | <i>Habia rubica peruviana</i>    | JK FMNH398440          | Perú                   | Madre de Dios | -12.6669 | -71.2706 |
| 91  | <i>Habia rubica peruviana</i>    | KU 457                 | Perú                   | Madre de Dios | -12.3300 | -69.0300 |
| 92  | <i>Habia rubica peruviana</i>    | KU 628                 | Perú                   | Madre de Dios | -12.3300 | -69.0300 |
| 93  | <i>Habia rubica peruviana</i>    | KU 636                 | Perú                   | Madre de Dios | -12.3300 | -69.0300 |
| 94  | <i>Habia rubica peruviana</i>    | KU 711                 | Perú                   | Madre de Dios | -12.3300 | -69.0300 |
| 95  | <i>Habia rubica peruviana</i>    | KU 722                 | Perú                   | Madre de Dios | -12.3300 | -69.0300 |
| 96  | <i>Habia rubica peruviana</i>    | LSUMNH 22625           | Bolivia                | La Paz        | -16.4997 | -68.1500 |
| 97  | <i>Habia rubica peruviana</i>    | LSUMNH 8909            | Bolivia                | Pando         | -10.7989 | -66.9988 |
| 98  | <i>Habia rubica peruviana</i>    | LSUMNH 8959            | Bolivia                | Pando         | -10.7989 | -66.9988 |
| 99  | <i>Habia rubica peruviana</i>    | LSUMNH 12591           | Bolivia                | Santa Cruz    | -17.8667 | -63.0000 |
| 100 | <i>Habia rubica peruviana</i>    | LSUMNH 12594           | Bolivia                | Santa Cruz    | -17.8667 | -63.0000 |
| 101 | <i>Habia rubica peruviana</i>    | JK 1052                | Bolivia                | La Paz        | -16.4997 | -68.1500 |
| 102 | <i>Habia rubica peruviana</i>    | JK 22623               | Bolivia                | La Paz        | -16.4997 | -68.1500 |
| 103 | <i>Habia rubica peruviana</i>    | JK 18345               | Bolivia                | Santa Cruz    | -17.8667 | -63.0000 |
| 104 | <i>Habia rubica peruviana</i>    | JK ZMUC 145305         | Bolivia                | Beni          | -14.3783 | -65.0958 |
| 105 | <i>Habia rubica peruviana</i>    | LSUMNH 36646           | W Brasil               | Rondúnia      | -11.5057 | -63.5806 |
| 106 | <i>Habia rubica rubica</i>       | JK ZMUC137118          | E Brasil               | Sao Paulo     | -23.6060 | -46.4588 |
| 107 | <i>Habia rubica rubica</i>       | JK ZMUC137117          | E Brasil               | Sao Paulo     | -23.6060 | -46.4588 |
| 108 | <i>Habia rubica rubica</i>       | JK FMNH345472          | E Brasil               | Sao Paulo     | -23.6060 | -46.4588 |
| 109 | <i>Habia rubica rubica</i>       | KU 205                 | Paraguay               | Caazapa       | -26.3500 | -55.5167 |
| 110 | <i>Habia rubica rubica</i>       | KU 226                 | Paraguay               | Caazapa       | -26.3500 | -55.5167 |
| 111 | <i>Habia rubica rubica</i>       | KU 259                 | Paraguay               | Caazapa       | -26.3500 | -55.5167 |
| 112 | <i>Habia rubica rubica</i>       | KU 313                 | Paraguay               | Caazapa       | -26.3500 | -55.5167 |
| 113 | <i>Habia rubica rubica</i>       | KU 3662                | Paraguay               | Itapua        | -26.5167 | -55.8000 |
| 114 | <i>Habia rubica rubica</i>       | KU 3785                | Paraguay               | Itapua        | -26.5167 | -55.8000 |

|     |                                  |               |            |            |          |          |
|-----|----------------------------------|---------------|------------|------------|----------|----------|
| 115 | <i>Habia rubica rubica</i>       | KU 3852       | Paraguay   | Itapua     | -26.5167 | -55.8000 |
| 116 | <i>Habia rubica rubica</i>       | KU 3853       | Paraguay   | Itapua     | -26.5167 | -55.8000 |
| 117 | <i>Habia rubica rubica</i>       | LSUMNH 25853  | Paraguay   | Caazapá    | -26.2261 | -56.0250 |
| 118 | <i>Habia rubica rubica</i>       | JK 25909      | Paraguay   | Caaguazú   | -25.4600 | -56.0200 |
| 119 | <i>Habia rubica rubica</i>       | JK 25830      | Paraguay   | Caazapá    | -26.2261 | -56.0250 |
| 120 | <i>Habia rubica rubica</i>       | JK ZMUC144784 | Paraguay   | Caazapá    | -26.0667 | -55.7500 |
| 121 | <i>Habia rubica rubica</i>       | JK MVZI68909  | Paraguay   | Itapúa     | -27.1833 | -55.7778 |
| 122 | <i>Habia rubica rubica</i>       | UWBM DHB1801  | Argentina  | Misiones   | -26.9552 | -55.0877 |
| 123 | <i>Habia rubica rubica</i>       | UWBM GAV821   | Argentina  | Misiones   | -26.9552 | -55.0877 |
| 124 | <i>Habia rubica rubica</i>       | UWBM GAV822   | Argentina  | Misiones   | -26.9552 | -55.0877 |
| 125 | <i>Habia rubica perijana</i>     | JK IC 1110    | Venezuela  | Barinas    | 8.3137   | -70.0503 |
| 126 | <i>Chlorothraupis carmioli</i>   | LSUMNH 106762 | Bolivia    | Beni       | -14.3783 | -65.0958 |
| 127 | <i>Chlorothraupis carmioli</i>   | LSUMNH 1068   | Bolivia    | La Paz     | -16.4997 | -68.1500 |
| 128 | <i>Chlorothraupis carmioli</i>   | LSUMNH 27849  | Perú       | Loreto     | -4.2325  | -74.2179 |
| 129 | <i>Chlorothraupis carmioli</i>   | LSUMNH 28343  | Panamá     | Panamá     | 8.9831   | -79.5167 |
| 130 | <i>Chlorothraupis carmioli</i>   | LSUMNH 2060   | Perú       | Pasco      | -10.4476 | -75.1545 |
| 131 | <i>Chlorothraupis carmioli</i>   | LSUMNH 21207  | Perú       | Puno       | -15.8402 | -70.0219 |
| 132 | <i>Chlorothraupis carmioli</i>   | LSUMNH 5510   | Perú       | San Martín | -7.2445  | -76.8260 |
| 133 | <i>Chlorothraupis carmioli</i>   | GB EF529900   | Ecuador    | ND         | ND       | ND       |
| 134 | <i>Chlorothraupis carmioli</i>   | GB KC007580   | Perú       | San Martín | -7.2445  | -76.8260 |
| 135 | <i>Chlorothraupis olivacea</i>   | LSUMNH 2196   | Panamá     | Darién     | 7.8682   | -77.8367 |
| 136 | <i>Chlorothraupis olivacea</i>   | LSUMNH 52930  | Panamá     | Darién     | 7.8682   | -77.8367 |
| 137 | <i>Chlorothraupis olivacea</i>   | GB EF529901   | Ecuador    | ND         | ND       | ND       |
| 138 | <i>Chlorothraupis stolzmanni</i> | LSUMNH 7860   | Ecuador    | El Oro     | -3.4455  | -79.8297 |
| 139 | <i>Chlorothraupis stolzmanni</i> | LSUMNH 7876   | Ecuador    | El Oro     | -3.4455  | -79.8297 |
| 140 | <i>Chlorothraupis stolzmanni</i> | LSUMNH 11847  | Ecuador    | Esmeraldas | -0.9682  | -79.6517 |
| 141 | <i>Chlorothraupis stolzmanni</i> | GB EF529899   | Ecuador    | ND         | -2.9650  | -79.1107 |
| 142 | <i>Habia gutturalis</i>          | JK TA15       | Colombia   | ND         | ND       | ND       |
| 143 | <i>Habia atrimaxillaris</i>      | UWBM ND       | Costa Rica | ND         | ND       | ND       |
| 144 | <i>Habia fuscicauda</i>          | MZFC B1908    | México     | Campeche   | 18.5928  | -90.2360 |

List of individuals sequenced, collection numbers, localities and georeferences. Museo de Zoología Alfonso L. Herrera (MZFC-UNAM); El Colegio de la frontera Sur, Unidad Chetumal (ECOSUR-CH); University of Washington, The Burke Museum (UWBM); (JK); Museum of Natural Science (Louisiana State University, LSUMNH) and The Natural History Museum (University of Kansas, KU).
