# Supplementary material for: Deep divergence of Red-crowned Ant Tanager (Habia rubica: Cardinalidae), a multilocus phylogenetic analysis with emphasis in Mesoamerica
Source: PubMed Central journal article supplement (PMC6139011; doi:10.7717/peerj.5496), 2018-09-12
Supplement: peerj-06-5496-s002.pdf [file peerj-06-5496-s002.pdf]

| Mitochondrial phylogroups           | <i>n</i> | <i>H</i> | <i>S</i> | <i>Hd</i> | $\pi$   | Tajima's <i>D</i> |          | Fu's <i>F<sub>s</sub></i> |          |
|-------------------------------------|----------|----------|----------|-----------|---------|-------------------|----------|---------------------------|----------|
|                                     |          |          |          |           |         | <i>D</i>          | P        | <i>F<sub>s</sub></i>      | P        |
| MX West Pacific (A)                 | 5        | 2        | 1        | 0.4       | 0.00044 | -0.8165           | P>0.10   | -0.8165                   | P>0.10   |
| MX South Pacific (B)                | 19       | 2        | 1        | 0.28070   | 0.00031 | -0.77799          | P>0.10   | -0.5736                   | P>0.10   |
| Eastern MX, Gulf Coast (C)          | 16       | 5        | 3        | 0.73333   | 0.00108 | -0.34679          | P>0.10   | -0.7063                   | P>0.10   |
| Yucatan Peninsula to Costa Rica (D) | 18       | 6        | 10       | 0.82353   | 0.00414 | 0.33984           | P>0.10   | 0.45503                   | P>0.10   |
| Guatemala and El Salvador (d)       | 13       | 4        | 3        | 0.52564   | 0.00065 | -1.43714          | P>0.10   | -1.35316                  | P>0.10   |
| Panama (E)                          | 8        | 5        | 9        | 0.85714   | 0.00395 | -0.04534          | P>0.10   | 0.139                     | P>0.10   |
| Western South America (F)           | 26       | 17       | 24       | 0.93538   | 0.00311 | -2.20278          | **P<0.01 | -3.20159                  | **P<0.02 |
| Eastern South America (G)           | 20       | 8        | 38       | 0.83684   | 0.00646 | -2.06341          | *P<0.05  | -3.27526                  | **P<0.02 |

Genetic diversity by phylogroups from mitochondrial DNA phylogeny. Numbers of individuals (*n*), haplotypes (*H*), segregation sites (*s*), haplotype diversity (*Hd*) nucleotide diversity ( $\pi$ ), Tajima and Fu parameters.
